# Supplementary material for: Autoimmune Rheumatic Disease Flares with Myocarditis Following COVID-19 mRNA Vaccination: A Case-Based Review
Source: MDPI journal article supplement (doi:10.3390/vaccines10101772), 2022-10-21
Supplement: s1 [file s1]

## Supplementary Materials

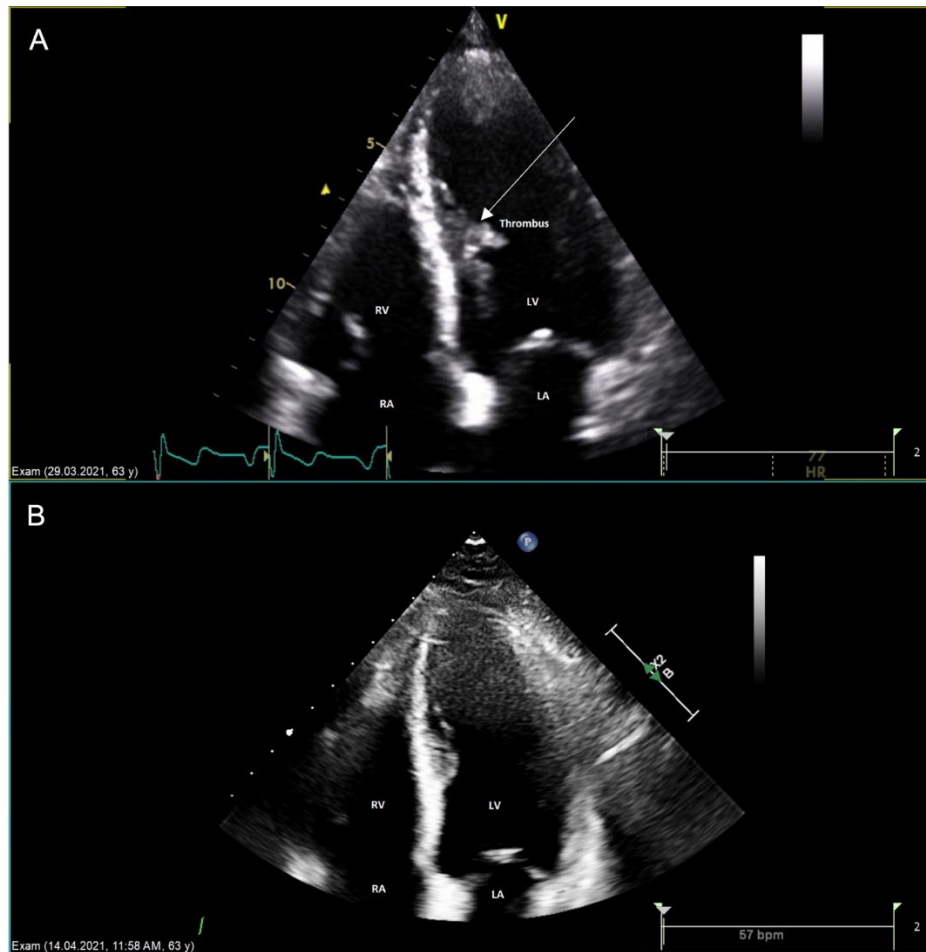

**Figure S1.** Trans-thoracic echocardiogram (TTE) four-chamber view in diastolic phase images of Case 2 showing (A) thrombi (white arrow) attached to the mid inferoseptal wall and (B) resolution of thrombi post treatment on repeat TTE 2 weeks later.

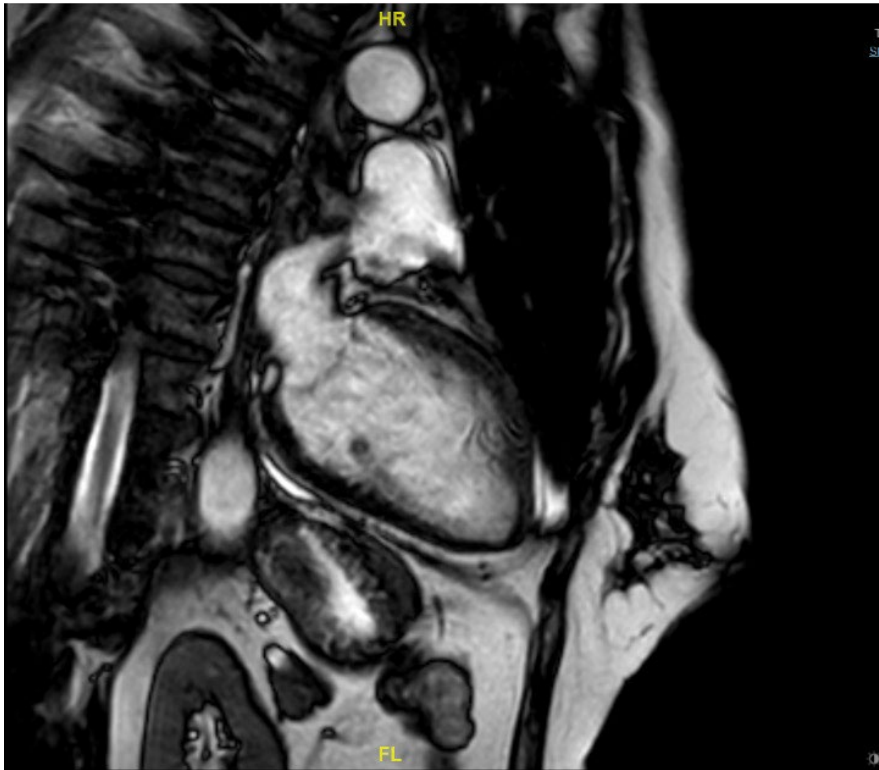

**Figure S2.** Steady-State Free Precession (SSFP) MRI sequence of Case 1 showing aknetic mid anterior wall in non ischemic pattern (white arrow) in diastolic (A) and systolic (B) phase.

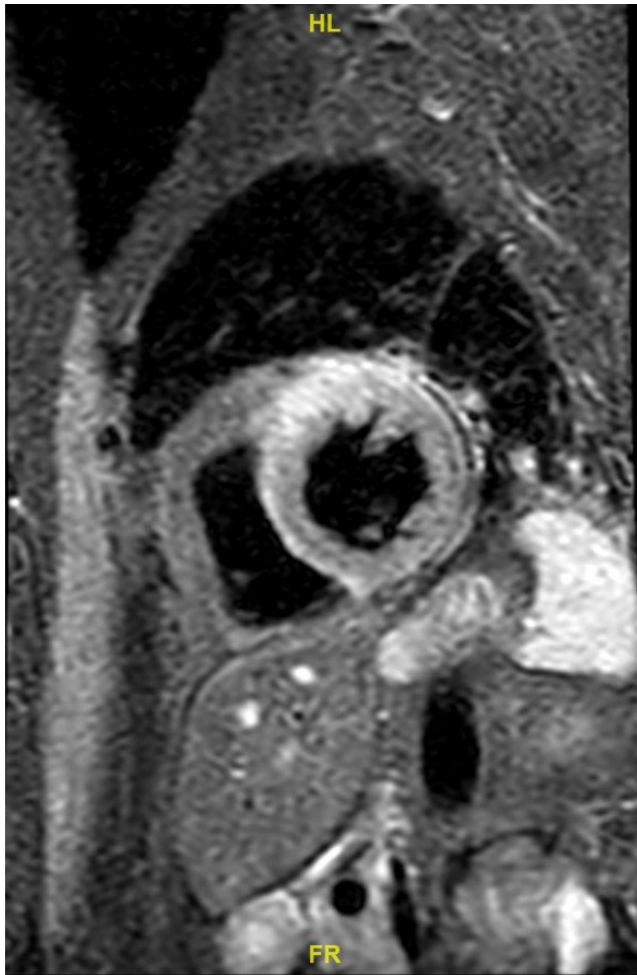

**Figure S3.** T2 weighted Short-Tau Inversion Recovery (T2w-STIR) sequence of Case 1 showing increased signal intensity in the mid-anterior wall segment demonstrating localized myocardial edema (white arrow).

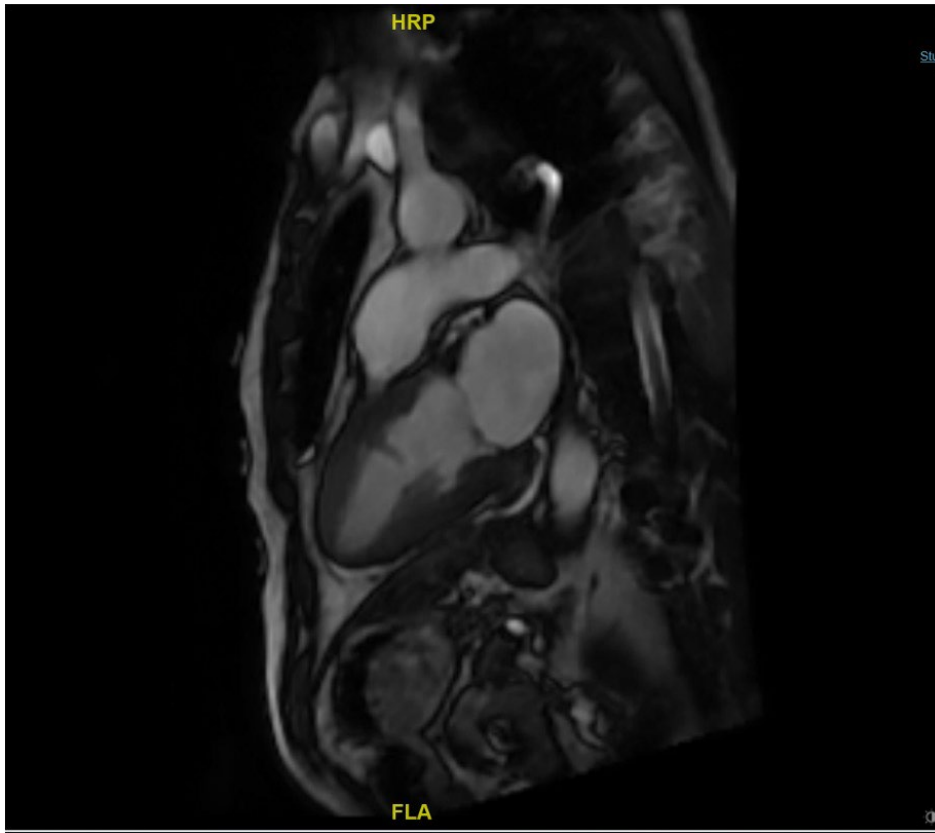

**Figure S4.** Steady-State Free Precession (SSFP) MRI sequence of Case 2 showing a mass (white arrow) attached to the endocardial surface of the mid-anterior segment of the left ventricle, suggestive of endomyocardial fibrosis with eosinophilic thrombi.

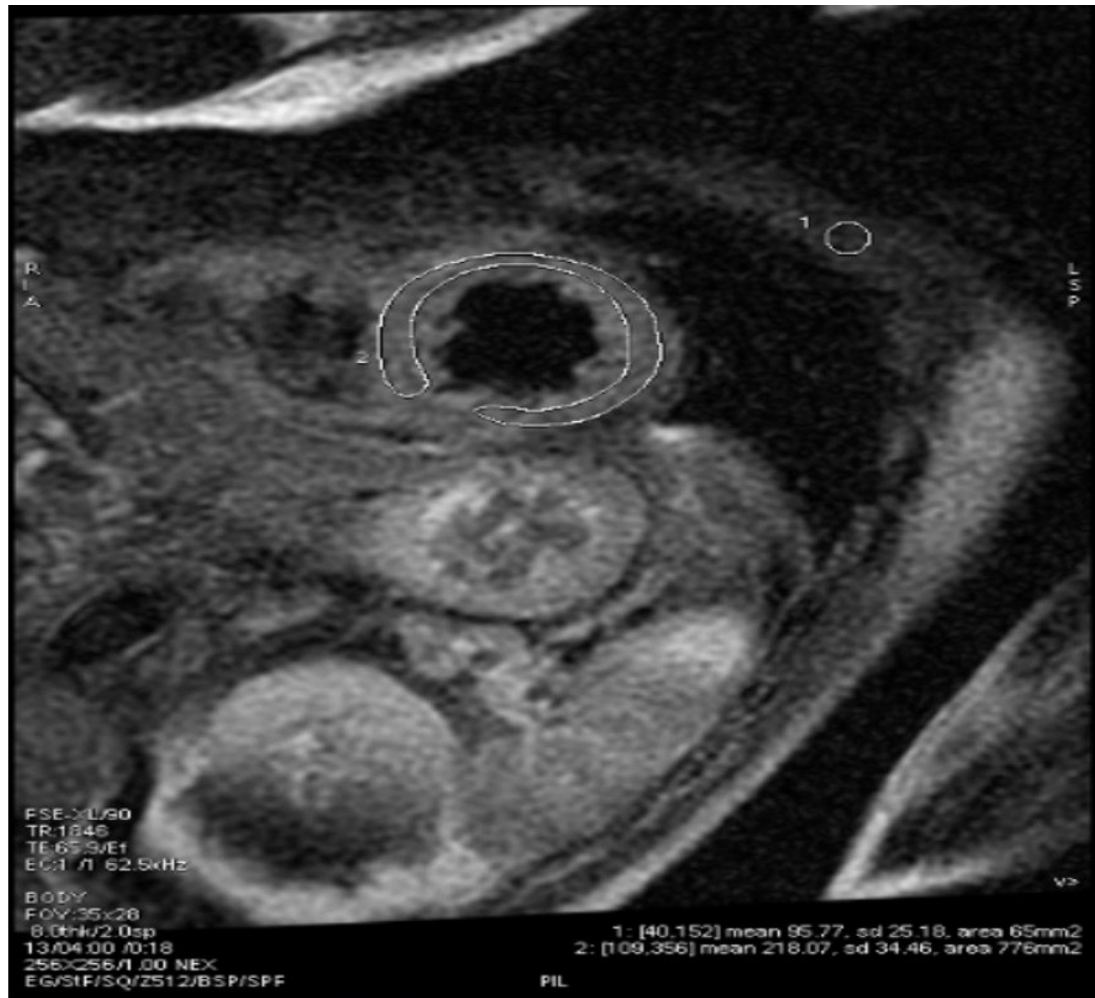

**Figure S5.** T2 weighted Short-Tau Inversion Recovery (T2w-STIR) sequence of a representative short axis left ventricular slice in Case 2, showing a Global STIR ratio of 2.3 ( $n < 1.9$ ), demonstrating diffuse myocardial edema (white arrow).

**Table S1.** Demographics and medical background of patients.

|                                                  | Patient 1                                                                                                            | Patient 2                                                                                  | Patient 3                                                                | Patient 4                                                                                                  | Patient 5                                                                                                                                                 |
|--------------------------------------------------|----------------------------------------------------------------------------------------------------------------------|--------------------------------------------------------------------------------------------|--------------------------------------------------------------------------|------------------------------------------------------------------------------------------------------------|-----------------------------------------------------------------------------------------------------------------------------------------------------------|
| Demographics:                                    |                                                                                                                      |                                                                                            |                                                                          |                                                                                                            |                                                                                                                                                           |
| Age (years) / ethnicity / gender                 | 63 / Chinese / female                                                                                                | 63 / Chinese / male                                                                        | 58 / Chinese / male                                                      | 43 / Burmese / female                                                                                      | 31/not reported/female                                                                                                                                    |
| <i>Medical and COVID-19 vaccination history</i>  |                                                                                                                      |                                                                                            |                                                                          |                                                                                                            |                                                                                                                                                           |
| ARD history<br><i>Diagnosis (manifestations)</i> | EGPA (left sciatic neuropathy, asthma, allergic rhinitis, peripheral eosinophilia, negative ANCA, positive anti-PR3) | Nil                                                                                        | SLE (anemia, thrombocytopenia, hypocomplementaemia, secondary Sjögren's) | SLE (Evans syndrome, Class 1/2 lupus nephritis with proteinuria, hypocomplementaemia, positive anti-dsDNA) | SLE with secondary APLS (Inflammatory arthritis, livedo reticularis, hypocomplementemia, positive APAs, ANA 1:1280 speckled, anti-Ro/Ro52/La, anti-dsDNA) |
| <i>Treatment</i>                                 | AZA 50mg OM                                                                                                          | N.A.                                                                                       | Pred 8-9mg/day and HCQ 200mg/day; defaulted treatment                    | AZA 150mg/day, HCQ ~285mg/day and Pred 6mg/day (recent reduction from 7.5mg/day 1 month ago)               | HCQ 200mg/day                                                                                                                                             |
| <i>ARD control before vaccination</i>            | BVAS 3, Eos 0.20 (3 months prior)                                                                                    | N.A.                                                                                       | SLEDAI-2K: 0 points (12 months prior)                                    | SLEDAI-2K: 2 points (3 months prior)                                                                       | SLEDAI-2K: 0 points                                                                                                                                       |
| Co-morbidities                                   | HTN on lisinopril 10mg OM, HLD on simvastatin 20mg ON<br>Benign colonic polyps                                       | Type II DM on metformin 500mg BD (HbA1c 6.7%), well-controlled asthma (no regular inhaler) | HTN on lisinopril of 5mg OM, recovered hepatitis B infection             | HLD on diet control, vitamin D insufficiency                                                               | Nil                                                                                                                                                       |
| Doses of COVID-19 mRNA vaccine                   | #1 Moderna                                                                                                           | #1 Pfizer                                                                                  | #1 Pfizer<br>#2 Pfizer                                                   | #1 Pfizer<br>#2 Pfizer                                                                                     | #1 Pfizer                                                                                                                                                 |

**Table S2:** Features of active ARD and myocarditis post-COVID-19 vaccination and their management

|                                              | Patient 1                                                        | Patient 2                                                                                                                                                                           | Patient 3                                                                                   | Patient 4                                                                          | Patient 5*                  |
|----------------------------------------------|------------------------------------------------------------------|-------------------------------------------------------------------------------------------------------------------------------------------------------------------------------------|---------------------------------------------------------------------------------------------|------------------------------------------------------------------------------------|-----------------------------|
| <i>Clinical summary</i>                      |                                                                  |                                                                                                                                                                                     |                                                                                             |                                                                                    |                             |
| Diagnosis and manifestations                 | EGPA flare – myocarditis, asthmatic exacerbation, polyarthralgia | Newly diagnosed active EGPA – myocarditis, adult-onset asthma, chronic rhinosinusitis, possible glomerulonephritis, hyper-eosinophilia, peripheral neuropathy, cutaneous vasculitis | SLE flare – myocarditis, thrombotic thrombocytopenic purpura, hypocomplementaemia           | SLE flare – myocarditis, Evan’s syndrome, fever, hypocomplementaemia               | SLE flare – myopericarditis |
| ARD symptom onset after COVID-19 vaccination |                                                                  |                                                                                                                                                                                     |                                                                                             |                                                                                    |                             |
| All                                          | 1 day after first dose                                           | 2 days after first dose                                                                                                                                                             | 3 days after first dose                                                                     | 6 weeks after first dose<br>1 week after second dose                               | 4 days after first dose     |
| Cardio-respiratory                           | 1 day after first dose                                           | 2 days after first dose                                                                                                                                                             | 6-7 weeks after first dose<br>3-4 weeks after second dose                                   | 8 weeks after first dose<br>2 weeks after second dose                              | 4 days after first dose     |
| Myocarditis diagnosis                        |                                                                  |                                                                                                                                                                                     |                                                                                             |                                                                                    |                             |
| Brighton CCD^<br>US CDC~                     | Definite<br>Confirmed                                            | Definite<br>Confirmed                                                                                                                                                               | Definite<br>Probable                                                                        | Definite<br>Probable                                                               | Probable<br>Probable        |
| <i>Investigations</i>                        |                                                                  |                                                                                                                                                                                     |                                                                                             |                                                                                    |                             |
| Haematology and biochemistry                 | WBC 11.4 Eos 0.88 Hb 14.5<br>Plt 215 Cr 71                       | WBC 12.0 Eos 5.39 Hb 11.5<br>Plt 143 Cr 76                                                                                                                                          | WBC 7.6 Hb 4.9 Plt 16 Cr 206<br>Haptoglobin <30 LDH 2525<br>PBF: many fragmented cells seen | WBC 9.8 Hb 5.8 Plt 7 Cr 43<br>PBF: giant platelet some macrocytes, no schistocytes | Not reported                |
| Peak Troponin I level                        | 1236                                                             | 1046                                                                                                                                                                                | 1066                                                                                        | 48                                                                                 | 159 Hs-trop (mg/L)          |

|                              |                                                                                                                                                                |                                                                                                                    |                                                                                                                                         |                                                                                            |                                                                             |
|------------------------------|----------------------------------------------------------------------------------------------------------------------------------------------------------------|--------------------------------------------------------------------------------------------------------------------|-----------------------------------------------------------------------------------------------------------------------------------------|--------------------------------------------------------------------------------------------|-----------------------------------------------------------------------------|
| Inflammatory markers         | CRP 7.5 ESR 25                                                                                                                                                 | CRP 31.4 ESR 112                                                                                                   | CRP 12.8 ESR 112                                                                                                                        | CRP 7.7 ESR not done                                                                       | CRP 68 ESR 92                                                               |
| Urinalysis                   | RBC 7 WBC 33<br>No protein on urine dipstick                                                                                                                   | RBC 113 (10% dysmorphic) WBC 1<br>24H UTP: negative                                                                | RBC 21 WBC 5<br>24H UTP: 1.18g/day                                                                                                      | RBC 5 WBC 2<br>No protein on urine dipstick                                                | Not reported                                                                |
| Serology                     | ANCA negative<br>Anti-PR3 10 ; Anti-MPO <2                                                                                                                     | ANCA negative<br>Anti-PR3 <2 ; Anti-MPO < 2                                                                        | Anti-dsDNA < 25                                                                                                                         | Anti-dsDNA – not performed                                                                 | Not reported                                                                |
| Cardiac                      |                                                                                                                                                                |                                                                                                                    |                                                                                                                                         |                                                                                            |                                                                             |
| Electrocardiogram            | Normal sinus rhythm.<br>Old changes of Q waves and TWI in V2, TWI in V3, 4.                                                                                    | Sinus tachycardia 115 bpm, ST segment depression + TWI in V4-V6                                                    | Sinus tachycardia, mild ST segment elevation II, LBBB (no previous ECG) III leads, AVF (early repolarization changes)                   |                                                                                            | Normal sinus rhythm                                                         |
| Transthoracic echocardiogram | LVEF 45% RWMA in LAD territory                                                                                                                                 | LVEF 55-60%, multiple masses up to 15mm in size in LV, attached to papillary muscles                               | Reduced LVEF 50%, global hypokinesia, mild circumferential pericardial effusion, moderate TR                                            | Reduced ejection fraction 50%, global hypokinesia                                          | Pericardial effusion 0.3cm                                                  |
| Cardiac MRI                  | Marked focal edema, myocardial hyperaemia and non-ischemic pattern of delayed myocardial enhancement at the apical, anteroseptal and basal anterior myocardium | Non-specific myocardial edema and filling defects attributed to small thrombi in LV, attached to papillary muscles | Not done                                                                                                                                | Not done                                                                                   | Not done                                                                    |
| <b>Management</b>            |                                                                                                                                                                |                                                                                                                    |                                                                                                                                         |                                                                                            |                                                                             |
| Induction                    | Pulse MP 3g total<br>IV CYC at 0.6g/m <sup>2</sup><br>BSA x 3 cycles                                                                                           | Pulse MP 1.5g total<br>PO CYC<br>~0.76mg/kg/day                                                                    | Pulse IV MP 3g total<br>Rituximab 375mg/m <sup>2</sup><br>BSA weekly x 4 doses<br>PLEX 22 sessions<br>IV CYC at 0.5g/m <sup>2</sup> BSA | IV MP 1.5g total<br>Rituximab 1g x 2 doses<br>Intravenous immunoglobulin 2g/kg body weight | PO prednisolone 25mg for 1 week then weaned to 5mg over subsequent 2 weeks. |



|             |                                                                     |                                                                            |                                                        |                                                                       |                                                              |
|-------------|---------------------------------------------------------------------|----------------------------------------------------------------------------|--------------------------------------------------------|-----------------------------------------------------------------------|--------------------------------------------------------------|
| Maintenance | AZA 50mg OM<br>(~0.83mg/kg/day)                                     | AZA 25mg OM<br>~0.35mg/kg/day after 8<br>months of CYC                     | MMF 1g/day                                             | AZA 150mg OM<br>~2mg/kg/day                                           | Not reported                                                 |
| Outcomes    | Trop normalized<br>Repeat TTE in 3m:<br>LVEF of 60% with no<br>RWMA | Trop normalized:<br>Repeat TTE in 3w:<br>resolution of multiple<br>thrombi | Trop normalized<br>Planned for repeat TTE<br>4m later. | Trop normalized<br>Repeat TTE in 3m:<br>improvement in LVEF<br>to 55% | Symptoms<br>improved. Repeat<br>Trop and TTE not<br>reported |

^According to Brighton Collaboration Case Definition. Tejtela SKS, Munozb FM, Al-Ammouric I, et al. Myocarditis and pericarditis: case definition and guidelines for data collection, analysis, and presentation of immunization safety data2021.

~According to US CDC Case Definition. Gargano JW, Wallace M, Hadler SC, et al. Use of mRNA COVID-19 Vaccine After Reports of Myocarditis Among Vaccine Recipients: Update from the Advisory Committee on Immunization Practices - United States, June 2021. MMWR Morb Mortal Wkly Rep 2021 Jul 9;70(27):977-982. 2021.

\* Patient 5 is a case described in Patel S, Wu E, Mundae M, Lim K. Myocarditis and pericarditis following mRNA vaccination in autoimmune inflammatory rheumatic disease patients: A single-center experience. Rheumatol Autoimmun. 2022;2(2):92-7DOI: 10.1002/rai2.12042.

Patient 1-4 is described in this case series

**Note:** ARD = autoimmune rheumatic disease. eGPA = eosinophilic granulomatosis polyangiitis. SLE = systemic lupus erythematosus. HTN = hypertension.

HLD = hyperlipidemia. DM = Diabetes Mellitus. TTP = thrombotic thrombocytopenic purpura. APLS = antiphospholipid syndrome, APAs = anti phospholipid antibodies (anticardiolipin antibody, anti-Beta2 glycoprotein antibody, Lupus anticoagulant), bpm= beats per minute. ECG = electrocardiogram. TTE = transthoracic echocardiogram. TWI = T wave inversion. LV = left ventricular. EF = ejection fraction. RWMA = regional wall motion abnormalities. cMRI: cardiac magnetic resonance imaging of heart. TR = tricuspid regurgitation. UTP= urine total protein. ANCA= anti-neutrophil cytoplasmic antibody. SLEDAI-2K = systemic lupus erythematosus disease activity index -2000. BVAS = Birmingham Vasculitis Activity Score. IV = intravenous. MP = methylprednisolone. CYC = cyclophosphamide. AZA = azathioprine. HCQ = hydroxychloroquine. Pred = prednisolone. MMF = mycophenolate mofetil. PLEX = plasma exchange

**Reference ranges:**

White blood cell count (WBC):  $(4.0 - 9.6 \times 10^9/L)$

Hemoglobin (Hb):  $(13.6 - 16.6 \text{ g/dL})$

Platelet (Plt):  $(150 - 360 \times 10^9/L)$

Eosinophil count (eos):  $(0.00-0.60 \times 10^9/L)$

Creatinine (Cr):  $(60-105 \mu\text{mol/L})$

Haptoglobin:  $(36-200 \text{ mg/dL})$

Lactate dehydrogenase (LDH):  $(270-550 \text{ U/L})$

uACR  $(0.0-2.5 \text{ mg/mmol})$ .

erythrocyte sedimentation rate (ESR):  $(1-10 \text{ mm/hr})$

c-reactive protein (CRP):  $7.5 (0.0 - 5.0 \text{ mg/L})$ .

Troponin I (Trop):  $(0-18 \text{ ng/L})$

Anti-double stranded DNA (anti-dsDNA):  $0 - 25 \text{ IU/mL}$

Anti-proteinase-3 (anti-PR3):  $(0-20 \text{ RU/ml})$ . Anti-myeloperoxidase (anti-MPO):  $(0-20 \text{ RU/ml})$
